# Supplementary material for: Impact of Different Lipid Ligands on the Stability and IgE-Binding Capacity of the Lentil Allergen Len c 3
Source: PubMed Central journal article supplement (PMC7763088; doi:10.3390/biom10121668), 2020-12-13
Supplement: biomolecules-10-01668-s001.pdf [file biomolecules-10-01668-s001.pdf]

## Supporting information

### Materials and Methods

#### *Production of the recombinant allergens*

The recombinant allergens were expressed as thioredoxin fusion proteins under control of the T7 promoter in *E. coli*. The BL-21 (DE3) cells transformed with pET-His8-TrxL-Len c 3 or pET-His8-TrxL-Pru p 3 were grown at 37°C in LB medium containing 100 mkg/mL of ampicillin and 20 mM glucose up to OD<sub>600</sub> 0.6-0.7. Then the cells were induced by adding 0.2 mM isopropylthio-β-D-galactopyranoside and further were incubated at 200 rpm for 4–12 h. Incubation temperature was lowered down to 30°C. After incubation the cells were harvested by centrifugation at 4,000 g and lysed by sonication on ice in the binding buffer (50 mM Tris-HCl, pH 7.8, 0.5 M NaCl, 20 mM imidazole) containing 1 mM phenylmethylsulfonyl fluoride. The soluble fractions were separated by centrifugation at 25,000 g for 20 min at 4°C and loaded onto a column with Ni Sepharose. The bound proteins were eluted with the binding buffer containing 0.5 M imidazole. After overnight dialysis against 0.15% acetic acid in water, the lyophilized fusion proteins were dissolved in 80% TFA (10 mg/mL) containing an equal mass of cyanogen bromide. The reaction mixtures were incubated for 16 h at 20°C in the dark. After 10-fold dilution with water, the samples were lyophilized and then subjected to a round of subtractive metal chelate chromatography under denaturing conditions (in the same buffer system containing 6 M guanidine hydrochloride). RP-HPLC was performed on a Reprosil-Pur C18–AQ RP column (5 μm, 250×10 mm, Dr. Masch, Ammerbuch, Germany) using a linear gradient from 5 to 80% acetonitrile with 0.1% TFA for 60 min at a flow rate of 2 mL/min. Homogeneity and identity of the recombinant allergens were confirmed by SDS-PAGE, MALDI mass spectrometry, CD spectroscopy and N-terminal automated microsequencing (Procise cLC 491 Protein Sequencing System, PE Applied Biosystems, Foster City, California, USA).

**Table S1.** Secondary structure estimation (%) predicted from Far-UV CD spectra.

| Sample           | Condition<br>s | <-helix, % | ®-sheet,<br>% | turn, % | random, % | NRMSD* |
|------------------|----------------|------------|---------------|---------|-----------|--------|
| Len c 3          | 20 °C          | 28.4       | 19.1          | 22.1    | 30.3      | 0.01   |
|                  | 98.5 °C        | 6.6        | 37.4          | 22.0    | 33.9      | 0.03   |
|                  | 20 °C end      | 5.6        | 37.7          | 21.8    | 34.9      | 0.04   |
| Len c 3<br>+LPPG | 20 °C          | 31.7       | 17.0          | 21.8    | 29.5      | 0.01   |
|                  | 98.5 °C        | 23.8       | 23.6          | 22.2    | 30.3      | 0.01   |
|                  | 20 °C end      | 31         | 17.3          | 22.2    | 29.4      | 0.01   |
| Len c 3<br>+LPPC | 20 °C          | 41.7       | 12.0          | 17.8    | 28.5      | 0.02   |
|                  | 98.5 °C        | 18.1       | 27.0          | 22.4    | 32.5      | 0.03   |
|                  | 20 °C end      | 9.4        | 34.7          | 22.1    | 33.7      | 0.02   |
| Len c 3<br>+LAU  | 20 °C          | 26.4       | 21.2          | 21.8    | 30.7      | 0.01   |
|                  | 98.5 °C        | 14.5       | 33.5          | 21.1    | 30.8      | 0.02   |
|                  | 20 °C end      | 15.8       | 31.6          | 20.6    | 32.0      | 0.02   |
| Len c 3<br>+STE  | 20 °C          | 26.5       | 22.5          | 21.0    | 30.1      | 0.02   |
|                  | 98.5 °C        | 8.6        | 35.6          | 22.5    | 33.3      | 0.04   |
|                  | 20 °C end      | 17.8       | 29.4          | 20.6    | 32.3      | 0.02   |
| Len c 3<br>+OLE  | 20 °C          | 29.1       | 18.4          | 22.0    | 30.5      | 0.01   |
|                  | 98.5 °C        | 16.2       | 30.1          | 22.5    | 31.1      | 0.04   |
|                  | 20 °C end      | 20.1       | 25.6          | 22.3    | 32.1      | 0.02   |
| Len c 3          | 20 °C          | 32.0       | 16.2          | 22.1    | 29.8      | 0.01   |

|      |           |      |      |      |      |      |
|------|-----------|------|------|------|------|------|
| +BEH | 98.5 °C   | 14.9 | 29.1 | 23.4 | 32.5 | 0.02 |
|      | 20 °C end | 15.0 | 30.7 | 22.1 | 32.2 | 0.02 |

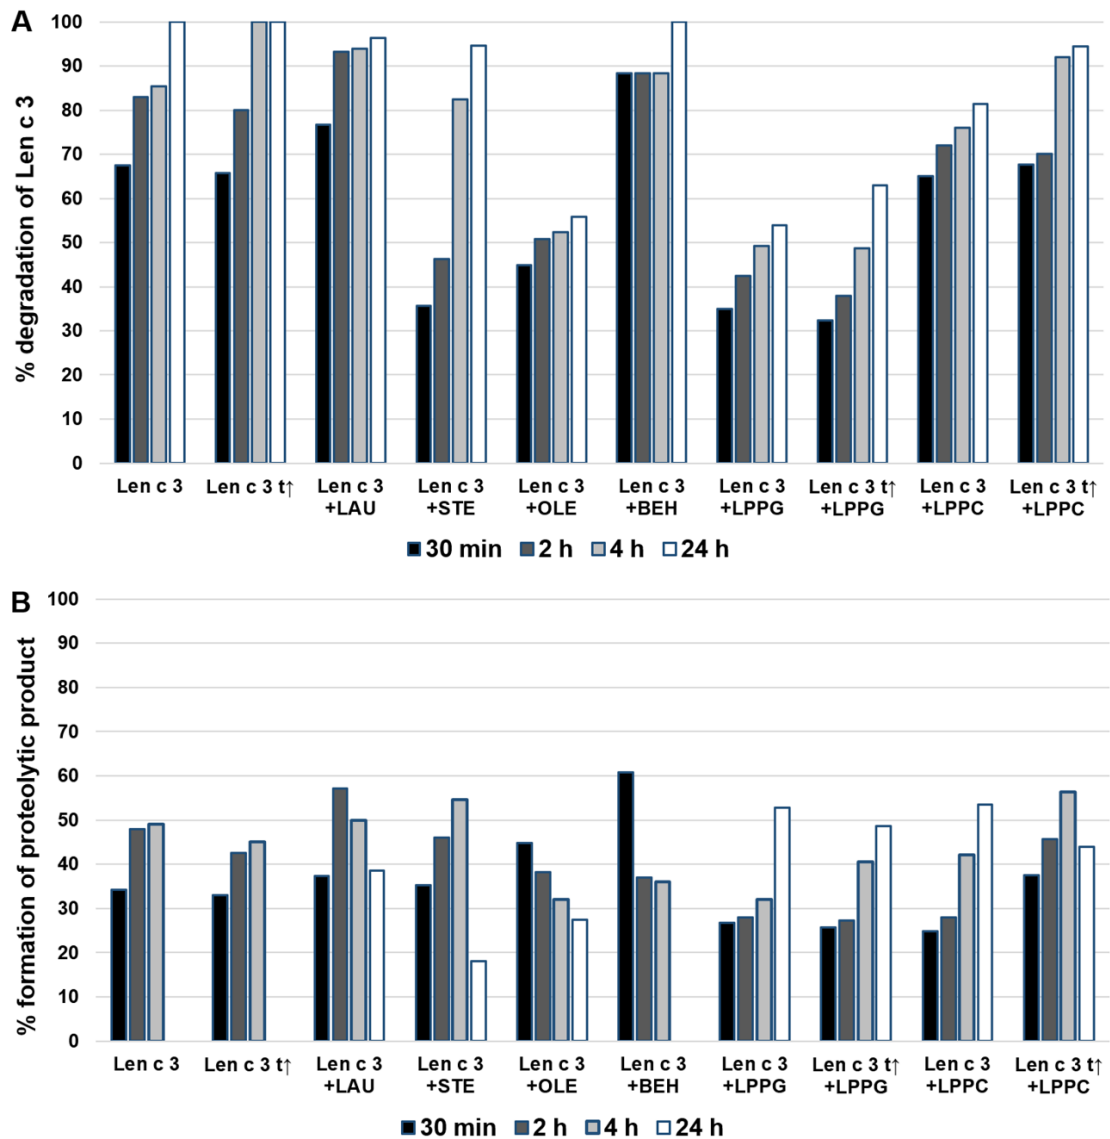

**Figure S1.** Analysis of duodenal allergen degradation. The bands corresponding to intact protein (A) and proteolytic product with M.w. 6-8 kDa (B) were scanned using laser densitometer. % Degradation of rLen c 3 was calculated as  $(S_o - S_a) / S_o * 100\%$ , where  $S_o$  is the area of rLen c 3 band at the initial time (0 min) and  $S_a$  is the area of allergen band at the studied time. % Formation of proteolytic product was calculated as  $(S_p) / S_o * 100\%$ , where  $S_p$  is the area of proteolytic product band at the studied time. Analysis of gastric protein digestion is not given since the allergen is practically not cleaved by pepsin.

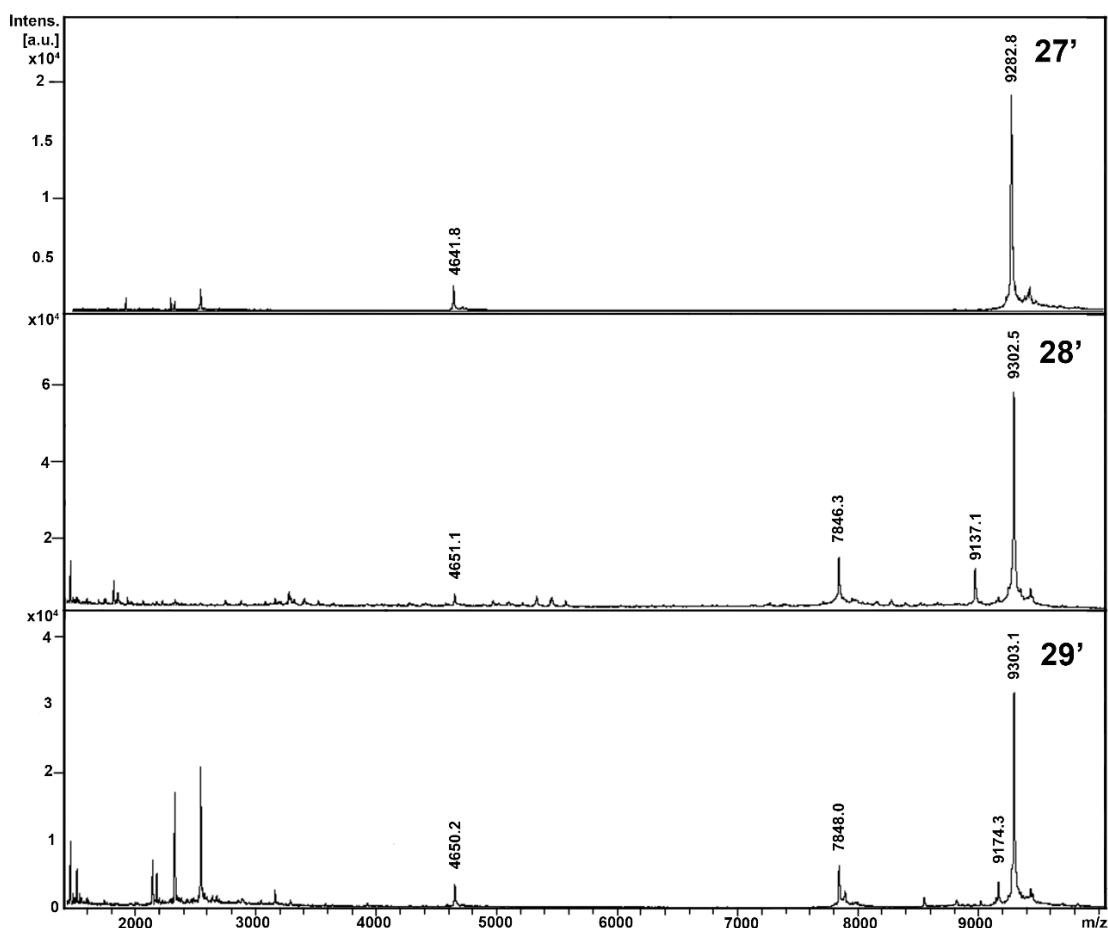

**Figure S2.** MALDI mass spectra of the RP-HPLC fractions (27, 28 and 29 minutes) of gastroduodenal digests of rLen c 3 alone and in the presence of LPPG.

**Table S2.** MALDI mass analysis of the gastroduodenal digests (gastric and subsequent duodenal digestion for 2 hours) of rLen c 3 alone and in the presence of LPPG.

| Fragment                              | Calculated mass<br>[M+H] <sup>+</sup><br>(Cys is oxidized) | Observed mass [M+H] <sup>+</sup> |              | Number<br>of Cys |
|---------------------------------------|------------------------------------------------------------|----------------------------------|--------------|------------------|
|                                       |                                                            | Len c 3                          | Len c 3+LPPG |                  |
| 1-15                                  | 1435.7                                                     | 1436.9                           | 1436.9       | 2                |
| 1-17                                  | 1699.9                                                     | -                                | 1702.0       | 2                |
| 1-18                                  | 1813.1                                                     | -                                | 1815.9       | 2                |
| 1-33 with cleavage<br>of peptide bond | 3155.6                                                     | 3156.8                           | 3156.8       | 4                |
| 1-34                                  | 3265.8                                                     | 3270.6                           | 3269.9       | 4                |
| 1-34 with cleavage<br>of peptide bond | 3283.8                                                     | 3284.7                           | 3284.5       | 4                |
| 1-80                                  | 7846.0                                                     | 7846.9                           | 7847.7       | 7                |
| 1-92                                  | 9136.5                                                     | 9137.4                           | 9135.8       | 8                |
| 1-93                                  | 9283.6                                                     | 9284.8                           | 9284.8       | 8                |
| 1-93 with cleavage<br>of peptide bond | 9301.6                                                     | 9302.7                           | 9302.7       | 8                |
| 16-33                                 | 1720.9                                                     | 1720.9                           | 1720.9       | 2                |
| 18-34                                 | 1584.9                                                     | 1587.0                           | 1587.0       | 2                |
| 19-33                                 | 1343.5                                                     | 1343.9                           | 1344.2       | 2                |
| 19-34                                 | 1471.7                                                     | 1472.0                           | 1471.9       | 2                |
| 34-45                                 | 1271.5                                                     | -                                | 1271.6       | -                |

|       |        |        |        |   |
|-------|--------|--------|--------|---|
| 35-45 | 1143.3 | 1143.0 | 1143.0 | - |
| 35-52 | 1845.1 | 1847.9 | -      | 2 |
| 36-45 | 1030.1 | -      | 1030.0 | - |
| 46-62 | 1677.9 | 1676.0 | 1675.9 | 2 |
| 54-62 | 847.9  | 847.2  | 847.0  | - |
| 62-73 | 1184.3 | -      | 1184.0 | - |
| 63-73 | 1071.2 | 1071.0 | 1071.0 | - |
| 63-80 | 1817.1 | 1817.9 | -      | 1 |
| 63-93 | 3254.7 | 3254.4 | -      | 2 |
| 81-92 | 1309.5 | 1310.1 | 1310.0 | 1 |
| 81-93 | 1456.7 | 1457.0 | 1456.9 | 1 |

**Table S3.** Characterization of patient sera\* containing sIgE to rLen c 3.

| No. | Age<br>(y.o.) | Sex<br>(M/F) | sIgE to peanut |            | Highest sIgE level |       |            | Other allergen<br>sources |
|-----|---------------|--------------|----------------|------------|--------------------|-------|------------|---------------------------|
|     |               |              | IU/ml          | RAST class | Source             | IU/ml | RAST class |                           |
| 1   | 4             | F            | 8.03           | 3.3        | birch              | >100  | 6          | po, hz                    |
| 2   | 4             | F            | 2.68           | 2.7        | peanut             | 2.68  | 2.7        | B                         |
| 3   | 42            | M            | 0.66           | 1.8        | -                  | -     | -          | nd                        |
| 4   | 6             | M            | 1.23           | 2.1        | grass              | 5.86  | 3.1        | B, wt, hz                 |
| 5   | 3             | M            | 0.43           | 1.2        | wheat              | 0.89  | 2          | nd                        |
| 6   | 3             | M            | 1.01           | 2.1        | birch              | >100  | 6          | A, H, G, R, hz, ct, wt    |
| 7   | 2             | M            | 0.84           | 2          | birch              | 2.2   | 2.5        | nd                        |
| 8   | 3             | M            | 1.9            | 2.4        | hazelnut           | 49.53 | 4.9        | B, G, R, M, sb            |
| 9   | 4             | F            | 0.74           | 2          | wheat              | 8.3   | 3.3        | nd                        |
| 10  | 6             | M            | 2.17           | 2.5        | rye                | 5.94  | 3.1        | B, hz, wt                 |
| 11  | 3             | M            | 4,52           | 3          | birch              | >100  | 6          | hz, ct, wt                |
| 12  | 3             | M            | 8.01           | 3.3        | birch              | >100  | 6          | hz, wt                    |
| 13  | 15            | M            | 0.51           | 1.4        | -                  | -     | -          | nd                        |
| 14  | 1             | M            | 8.3            | 3.3        | peanut             | 8.3   | 3.3        | hz                        |
| 15  | 4             | F            | 0.49           | 1.4        | wheat              | 0.62  | 1.7        | nd                        |
| 16  | 2             | F            | 1.23           | 2.1        | hazelnut           | 2.62  | 2.6        | wn, cl                    |
| 17  | 1             | F            | 4.39           | 3          | hazelnut           | 25.96 | 4.2        | am, wt, ry                |
| 18  | 11            | M            | 1.85           | 2.4        | birch              | >100  | 6          | G, wt, hz, ct             |
| 19  | 10            | M            | 0.19           | 0.5        | peanut             | 0.19  | 0.5        | nd                        |

|    |    |   |      |     |         |       |     |                               |
|----|----|---|------|-----|---------|-------|-----|-------------------------------|
| 20 | 2  | F | >100 | 6   | peanut  | >100  | 6   | hz, sb, po, wt                |
| 21 | 7  | M | 3.68 | 3   | birch   | >100  | 6   | A, H, R, hz, ct, wt, sb       |
| 22 | 3  | M | 2.68 | 2.7 | birch   | >100  | 6   | G, sb, ct, po, wt, hz         |
| 23 | 4  | M | 0.89 | 2   | birch   | >100  | 6   | G, hz                         |
| 24 | 4  | F | 0.49 | 1.4 | birch   | 3.52  | 3   | G, ct, po, wt                 |
| 25 | 6  | M | 0.55 | 1.5 | rye     | 18.57 | 4   | ct, ap, wt                    |
| 26 | 2  | F | 0.32 | 0.9 | birch   | 15.71 | 3.8 | nd                            |
| 27 | 2  | M | 1.06 | 2.1 | wheat   | 2.17  | 2.5 | nd                            |
| 28 | 3  | F | 0.89 | 2   | peanut  | 0.89  | 2   | nd                            |
| 29 | 3  | F | >100 | 6   | birch   | >100  | 6   | A, H, hz                      |
| 30 | 7  | F | -    | -   | birch   | 17.93 | 4   | A, H, R                       |
| 31 | 15 | F | -    | -   | celery  | 0.95  | 2   | po                            |
| 32 | 4  | M | -    | -   | birch   | 7.79  | 3.3 | A, H, G, R, M                 |
| 33 | 25 | M | 0.7  | 2   | mugwort | 48.9  | 4.9 | G, R, sb, wt, hz, wn, cl, ap  |
| 34 | 4  | M | -    | -   | mugwort | >100  | 6   | G, R                          |
| 35 | 10 | F | -    | -   | birch   | >100  | 6   | A, H                          |
| 36 | 11 | M | 6.32 | 3.2 | birch   | >100  | 6   | A, H, G, R, M, sb, ct, wt, hz |
| 37 | 11 | M | -    | -   | birch   | >100  | 6   | A, H, R, G                    |
| 38 | 4  | M | 3.7  | 3.7 | birch   | 94.09 | 5.8 | G, sb, ct, po, wt, hz         |

nd – not determined. \*Patients with food and pollen allergy had such allergic symptoms as rhinitis, conjunctivitis, atopic dermatitis, and oral allergy syndrome.

Description of RAST classes: 0 class – not detectable or trace IgE level [0,00-0,34 IU/ml]; 1 class – threshold level [0,35-0,69 IU/ml]; 2 class – elevated IgE level [0,70-3,49 IU/ml]; 3 class - significantly elevated IgE level [3,50-17,49 IU/ml]; 4 class – high IgE level [17,5-49,99 IU/ml]; 5 class – very high IgE level [50,0-99,99 IU/ml]; 6 class - extremely high IgE level [ $\geq$ 100,0 IU/ml]

Inhalant: B = birch pollen, G = grass pollen, A = alder pollen, H = hazel pollen, R = rye pollen, M = mugwort pollen

Food: sb = soybean, ct = carrot, po = potato, wt = wheat, hz = hazelnut, am = almond, wn = walnut, ry = rye, cl = celery, ap = apple
